# Supplementary material for: A Systematic Approach to Defining the microRNA Landscape in Metastasis
Source: Oxford University Press journal article supplement (doi:10.1158/0008-5472.can-15-0997), 2015-06-11
Supplement: 00085472can150997-sup-148238_0_supp_0_np0zqh.xlsx [file 00085472can150997-sup-148238_0_supp_0_np0zqh.xlsx]

## Sheet: Tabelle1
Tm vs Nm	Met vs Tm	Common elements in “Met vs Nm” and “Tm vs Nm	TABLE S1
hsa-miR-31	hsa-miR-122a	hsa-miR-503
hsa-miR-503	hsa-miR-142-5p	hsa-miR-31
hsa-miR-424	hsa-miR-19a	HS_29
hsa-miR-483	hsa-miR-19b	hsa-miR-424
HS_29	hsa-miR-33	hsa-miR-542-3p
hsa-miR-182	hsa-miR-135b	hsa-miR-675
hsa-miR-542-3p	hsa-miR-101	hsa-miR-584
hsa-miR-224	hsa-miR-32	hsa-miR-9*
hsa-miR-183	hsa-miR-210	hsa-miR-504
hsa-miR-146b	hsa-miR-33b	hsa-miR-378
hsa-miR-409-3p	hsa-miR-142-3p	hsa-miR-133a
hsa-miR-34a	hsa-miR-455	hsa-miR-215
hsa-miR-493-5p	hsa-miR-30e-5p
hsa-miR-452	hsa-miR-301
hsa-miR-584	hsa-miR-17-3p
hsa-miR-127	hsa-miR-34b
hsa-miR-17-3p	hsa-miR-570
hsa-miR-552	hsa-miR-182*
hsa-miR-411	hsa-miR-376b
hsa-miR-675	hsa-miR-107
HS_243.1	hsa-miR-154*
hsa-miR-134	HS_243.1
hsa-miR-493-3p	HS_92.1
hsa-miR-431	hsa-miR-140
HS_263.1	hsa-miR-106a
HS_94	hsa-miR-188
hsa-miR-370	hsa-miR-205
hsa-miR-494	hsa-miR-362
hsa-miR-190	hsa-miR-542-5p
hsa-miR-568	hsa-miR-34c
hsa-miR-517a	HS_170
HS_33	hsa-miR-425
hsa-miR-9*	hsa-miR-610
hsa-miR-766	hsa-miR-193b
hsa-miR-504	hsa-miR-151
hsa-miR-519a	hsa-miR-92b
hsa-miR-378	hsa-miR-500
hsa-miR-139	hsa-miR-28
hsa-miR-137	HS_94
hsa-miR-133a	hsa-miR-483
hsa-miR-215	hsa-let-7e
hsa-miR-1	HS_114
	HS_303_a
	hsa-miR-574
	hsa-miR-126*
	hsa-miR-30a-3p
	hsa-miR-654
	hsa-miR-214
	hsa-miR-137
	hsa-miR-421
	hsa-miR-143
	hsa-miR-493-5p
	hsa-miR-598
	hsa-miR-139
	hsa-miR-299-5p
	hsa-let-7d
	hsa-miR-132
	hsa-miR-148b
	HS_214.1
	hsa-miR-628
	hsa-miR-98
	hsa-miR-511
	hsa-miR-382
	hsa-miR-409-3p
	hsa-miR-199a*
	hsa-miR-576
	hsa-miR-328
	hsa-miR-187
	hsa-miR-99b
	hsa-miR-370
	hsa-miR-490
	hsa-miR-379
	hsa-miR-487b
	hsa-miR-181b
	hsa-miR-329
	hsa-miR-375
	hsa-miR-432
	hsa-miR-411
	hsa-miR-152
	hsa-miR-134
	hsa-miR-218
	hsa-miR-10a
	hsa-miR-196b
	hsa-miR-1
	hsa-miR-10b
