# Supplementary material for: A Systematic Approach to Defining the microRNA Landscape in Metastasis
Source: Oxford University Press journal article supplement (doi:10.1158/0008-5472.can-15-0997), 2015-06-11
Supplement: 00085472can150997-sup-148238_0_supp_0_np0zqq.xlsx [file 00085472can150997-sup-148238_0_supp_0_np0zqq.xlsx]

## Sheet: Analysis_Comparison_Gene_List
Gene Name	forkhead box N3	TABLE S2
Gene Symbol	FOXN3
Analysis Comparison	Tumor vs Normal	Sample size	Gene Rank	P-Value
Analysis 1:	Ovarian Serous Adenocarcinoma vs. Normal (Adib Ovarian)	16	78	0.000158
Analysis 2:	Pleomorphic Myxofibrosarcoma vs. Normal (Barretina Sarcoma)	158	1688	0.018
Analysis 3:	Burkitt's Lymphoma vs. Normal (Basso Lymphoma)	127	34	1.25e-09
Analysis 4:	Centroblastic Lymphoma vs. Normal (Basso Lymphoma)	28	77	3.39e-14
Analysis 5:	Diffuse Large B-Cell Lymphoma vs. Normal (Basso Lymphoma)	41	4	5.91e-14
Analysis 6:	Hairy Cell Leukemia vs. Normal (Basso Lymphoma)	16	44	1.77e-11
Analysis 7:	Primary Effusion Lymphoma vs. Normal (Basso Lymphoma)	9	104	2.48e-07
Analysis 8:	Lung Adenocarcinoma vs. Normal (Beer Lung)	86	580	3.47e-05
Analysis 9:	Lung Adenocarcinoma vs. Normal (Bhattacharjee Lung)	139	719	0.000249
Analysis 10:	Lung Carcinoid Tumor vs. Normal (Bhattacharjee Lung)	20	1294	2.24e-05
Analysis 11:	Small Cell Lung Carcinoma vs. Normal (Bhattacharjee Lung)	6	1907	0.000736
Analysis 12:	Infiltrating Bladder Urothelial Carcinoma vs. Normal (Blaveri Bladder 2)	54	698	0.047
Analysis 13:	Superficial Bladder Cancer vs. Normal (Blaveri Bladder 2)	27	648	0.03
Analysis 14:	Ovarian Carcinoma vs. Normal (Bonome Ovarian)	185	1992	3.61e-05
Analysis 15:	Burkitt's Lymphoma vs. Normal (Brune Lymphoma)	5	35	4.68e-11
Analysis 16:	Diffuse Large B-Cell Lymphoma vs. Normal (Brune Lymphoma)	11	616	5.88e-06
Analysis 17:	Follicular Lymphoma vs. Normal (Brune Lymphoma)	5	96	1.53e-06
Analysis 18:	Hodgkin's Lymphoma vs. Normal (Brune Lymphoma)	12	255	3.02e-08
Analysis 19:	Gastric Intestinal Type Adenocarcinoma vs. Normal (Chen Gastric)	60	659	9.73e-07
Analysis 20:	Diffuse Large B-Cell Lymphoma vs. Normal (Compagno Lymphoma)	44	867	7.43e-13
Analysis 21:	Follicular Lymphoma vs. Normal (Compagno Lymphoma)	38	42	1.19e-18
Analysis 22:	Germinal Center B-Cell-Like Diffuse Large B-Cell Lymphoma vs. Normal (Compagno Lymphoma)	9	2420	6.26e-05
Analysis 23:	Benign Breast Neoplasm vs. Normal (Curtis Breast)	3	989	0.007
Analysis 24:	Breast Carcinoma vs. Normal (Curtis Breast)	14	1202	7.31e-06
Analysis 25:	Ductal Breast Carcinoma in Situ vs. Normal (Curtis Breast)	10	1582	0.000277
Analysis 26:	Invasive Breast Carcinoma vs. Normal (Curtis Breast)	21	933	1.48e-07
Analysis 27:	Invasive Ductal and Invasive Lobular Breast Carcinoma vs. Normal (Curtis Breast)	90	340	3.89e-38
Analysis 28:	Invasive Ductal Breast Carcinoma vs. Normal (Curtis Breast)	1556	466	1.79e-65
Analysis 29:	Invasive Lobular Breast Carcinoma vs. Normal (Curtis Breast)	148	394	2.2e-43
Analysis 30:	Medullary Breast Carcinoma vs. Normal (Curtis Breast)	32	715	1.06e-13
Analysis 31:	Mucinous Breast Carcinoma vs. Normal (Curtis Breast)	46	571	1.43e-21
Analysis 32:	Tubular Breast Carcinoma vs. Normal (Curtis Breast)	67	591	3.2e-29
Analysis 33:	Malignant Fibrous Histiocytoma vs. Normal (Detwiller Sarcoma)	9	153	4.28e-05
Analysis 34:	Synovial Sarcoma vs. Normal (Detwiller Sarcoma)	4	1065	0.004
Analysis 35:	Anaplastic Large Cell Lymphoma, ALK-Negative vs. Normal (Eckerle Lymphoma)	4	1608	0.008
Analysis 36:	Anaplastic Large Cell Lymphoma, ALK-Positive vs. Normal (Eckerle Lymphoma)	5	633	0.000122
Analysis 37:	Classical Hodgkin's Lymphoma vs. Normal (Eckerle Lymphoma)	4	801	0.00054
Analysis 38:	Primary Cutaneous Anaplastic Large Cell Lymphoma vs. Normal (Eckerle Lymphoma)	7	767	8.91e-05
Analysis 39:	Invasive Breast Carcinoma Stroma vs. Normal (Finak Breast)	53	6032	1.04e-05
Analysis 40:	Rectal Adenocarcinoma vs. Normal (Gaedcke Colorectal)	65	2288	1.97e-12
Analysis 41:	Invasive Breast Carcinoma vs. Normal (Gluck Breast)	154	4005	0.029
Analysis 42:	Prostate Carcinoma vs. Normal (Grasso Prostate)	94	351	3.43e-09
Analysis 43:	Pilocytic Astrocytoma vs. Normal (Gutmann Brain)	8	1111	0.039
Analysis 44:	Esophageal Adenocarcinoma vs. Normal (Hao Esophagus)	5	844	0.008
Analysis 45:	Melanoma vs. Normal (Haqq Melanoma)	25	19	6.14e-06
Analysis 46:	Non-Neoplastic Nevus vs. Normal (Haqq Melanoma)	9	459	0.003
Analysis 47:	Ovarian Clear Cell Adenocarcinoma vs. Normal (Hendrix Ovarian)	8	980	7.33e-05
Analysis 48:	Large Cell Lung Carcinoma vs. Normal (Hou Lung)	19	3037	3.39e-05
Analysis 49:	Lung Adenocarcinoma vs. Normal (Hou Lung)	45	777	1.67e-13
Analysis 50:	Pancreatic Ductal Adenocarcinoma vs. Normal (Ishikawa Pancreas)	24	953	0.019
Analysis 51:	Lung Adenocarcinoma vs. Normal (Landi Lung)	58	575	8.52e-15
Analysis 52:	Prostate Carcinoma vs. Normal (LaTulippe Prostate)	32	636	0.006
Analysis 53:	Glioblastoma vs. Normal (Lee Brain)	78	3210	3.91e-05
Analysis 54:	Ovarian Clear Cell Adenocarcinoma vs. Normal (Lu Ovarian)	7	709	0.005
Analysis 55:	Ovarian Endometrioid Adenocarcinoma vs. Normal (Lu Ovarian)	9	1119	0.01
Analysis 56:	Ovarian Serous Adenocarcinoma vs. Normal (Lu Ovarian)	20	791	0.004
Analysis 57:	Ductal Breast Carcinoma in Situ Epithelia vs. Normal (Ma Breast 4)	20	792	0.000635
Analysis 58:	Invasive Ductal Breast Carcinoma Epithelia vs. Normal (Ma Breast 4)	18	818	0.001
Analysis 59:	Oral Cavity Squamous Cell Carcinoma vs. Normal (Peng Head-Neck)	57	456	1.87e-12
Analysis 60:	Anaplastic Large Cell Lymphoma vs. Normal (Piccaluga Lymphoma)	6	350	2.26e-08
Analysis 61:	Classic Medulloblastoma vs. Normal (Pomeroy Brain)	46	202	1.28e-05
Analysis 62:	Desmoplastic Medulloblastoma vs. Normal (Pomeroy Brain)	14	630	0.016
Analysis 63:	Malignant Glioma, NOS vs. Normal (Pomeroy Brain)	10	152	0.001
Analysis 64:	Cervical Cancer vs. Normal (Pyeon Multi-cancer)	20	319	2.85e-08
Analysis 65:	Oropharyngeal Carcinoma vs. Normal (Pyeon Multi-cancer)	6	3539	0.004
Analysis 66:	Ductal Breast Carcinoma vs. Normal (Richardson Breast 2)	40	917	2.31e-06
Analysis 67:	Cutaneous Melanoma vs. Normal (Riker Melanoma)	14	314	6.07e-05
Analysis 68:	Skin Basal Cell Carcinoma vs. Normal (Riker Melanoma)	15	271	8.18e-05
Analysis 69:	Skin Squamous Cell Carcinoma vs. Normal (Riker Melanoma)	11	287	0.000754
Analysis 70:	Diffuse Large B-Cell Lymphoma vs. Normal (Rosenwald Multi-cancer)	39	106	1.9e-05
Analysis 71:	Follicular Lymphoma vs. Normal (Rosenwald Multi-cancer)	7	198	0.002
Analysis 72:	Infiltrating Bladder Urothelial Carcinoma vs. Normal (Sanchez-Carbayo Bladder 2)	81	443	2.39e-14
Analysis 73:	Superficial Bladder Cancer vs. Normal (Sanchez-Carbayo Bladder 2)	28	900	3.56e-09
Analysis 74:	Vulvar Intraepithelial Neoplasia vs. Normal (Santegoets Vulva)	9	2923	0.024
Analysis 75:	Nasopharyngeal Carcinoma vs. Normal (Sengupta Head-Neck)	31	115	1.86e-06
Analysis 76:	Colorectal Carcinoma vs. Normal (Skrzypczak Colorectal)	36	291	8.87e-13
Analysis 77:	Colon Carcinoma Epithelia vs. Normal (Skrzypczak Colorectal 2)	10	1302	6.55e-06
Analysis 78:	Colon Carcinoma vs. Normal (Skrzypczak Colorectal 2)	10	1642	2.63e-05
Analysis 79:	Ductal Breast Carcinoma vs. Normal (Sorlie Breast)	68	901	0.026
Analysis 80:	Fibroadenoma vs. Normal (Sorlie Breast)	2	165	0.008
Analysis 81:	Ductal Breast Carcinoma vs. Normal (Sorlie Breast 2)	123	1043	0.033
Analysis 82:	Fibroadenoma vs. Normal (Sorlie Breast 2)	2	216	0.014
Analysis 83:	Lung Adenocarcinoma vs. Normal (Stearman Lung)	20	485	9.52e-06
Analysis 84:	Acute Myeloid Leukemia vs. Normal (Stegmaier Leukemia)	9	1912	0.013
Analysis 85:	Lung Adenocarcinoma vs. Normal (Su Lung)	31	952	1.12e-05
Analysis 86:	Intraductal Cribriform Breast Adenocarcinoma vs. Normal (TCGA Breast)	3	276	9.59e-08
Analysis 87:	Invasive Breast Carcinoma vs. Normal (TCGA Breast)	76	460	1.53e-21
Analysis 88:	Invasive Ductal and Lobular Carcinoma vs. Normal (TCGA Breast)	3	2431	0.008
Analysis 89:	Invasive Ductal Breast Carcinoma vs. Normal (TCGA Breast)	392	971	2.18e-27
Analysis 90:	Invasive Lobular Breast Carcinoma vs. Normal (TCGA Breast)	36	803	6.44e-12
Analysis 91:	Male Breast Carcinoma vs. Normal (TCGA Breast)	3	37	1.93e-20
Analysis 92:	Mixed Lobular and Ductal Breast Carcinoma vs. Normal (TCGA Breast)	7	2343	0.001
Analysis 93:	Mucinous Breast Carcinoma vs. Normal (TCGA Breast)	4	2157	0.007
Analysis 94:	Cecum Adenocarcinoma vs. Normal (TCGA Colorectal)	24	223	6.84e-16
Analysis 95:	Colon Adenocarcinoma vs. Normal (TCGA Colorectal)	102	241	5.87e-24
Analysis 96:	Colon Mucinous Adenocarcinoma vs. Normal (TCGA Colorectal)	20	891	1.91e-10
Analysis 97:	Rectal Adenocarcinoma vs. Normal (TCGA Colorectal)	60	251	4.1e-23
Analysis 98:	Rectal Mucinous Adenocarcinoma vs. Normal (TCGA Colorectal)	6	1642	7.7e-05
Analysis 99:	Invasive Lobular Breast Carcinoma vs. Normal (Turashvili Breast)	5	1229	0.039
Analysis 100:	Prostate Carcinoma vs. Normal (Varambally Prostate)	13	287	0.000221
Analysis 101:	Squamous Cell Lung Carcinoma vs. Normal (Wachi Lung)	5	1589	0.009
Analysis 102:	Gastric Cancer vs. Normal (Wang Gastric)	12	2157	0.022
Analysis 103:	Prostate Carcinoma vs. Normal (Welsh Prostate)	34	56	3.7e-07
Analysis 104:	Ovarian Serous Adenocarcinoma vs. Normal (Yoshihara Ovarian)	43	132	4.37e-16
Analysis 105:	Clear Cell Renal Cell Carcinoma vs. Normal (Yusenko Renal)	26	2311	0.015
Analysis 106:	Papillary Renal Cell Carcinoma vs. Normal (Yusenko Renal)	19	2729	0.025
Analysis 107:	High Grade Cervical Squamous Intraepithelial Neoplasia Epithelia vs. Normal (Zhai Cervix)	7	763	0.002
Analysis 108:	Monoclonal Gammopathy of Undetermined Significance vs. Normal (Zhan Myeloma 3)	44	2960	0.003
Analysis 109:	B-Cell Childhood Acute Lymphoblastic Leukemia vs. Normal (Zhang Leukemia)	483	832	0.000292
Analysis 110:	T-Cell Childhood Acute Lymphoblastic Leukemia vs. Normal (Zhang Leukemia)	84	435	2.49e-05
Analysis 111:	Invasive Ductal Breast Carcinoma vs. Normal (Zhao Breast)	40	156	5.74e-08
	Total number of patients	6163
		Median	709	0.005
